# Supplementary material for: On the role of aerosol radiative effect in the wet season onset timing over the Congo rainforest during boreal autumn
Source: Copernicus journal article supplement (doi:10.5194/acp-21-12855-2021), 2021-08-31
Supplement: Supplementary file 1 [file acp-21-12855-2021-supplement.pdf]

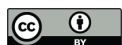

*Supplement of*

## **On the role of aerosol radiative effect in the wet season onset timing over the Congo rainforest during boreal autumn**

**Sudip Chakraborty et al.**

*Correspondence to:* Sudip Chakraborty ([sudip.chakraborty@jpl.nasa.gov](mailto:sudip.chakraborty@jpl.nasa.gov))

The copyright of individual parts of the supplement might differ from the article licence.

18

19

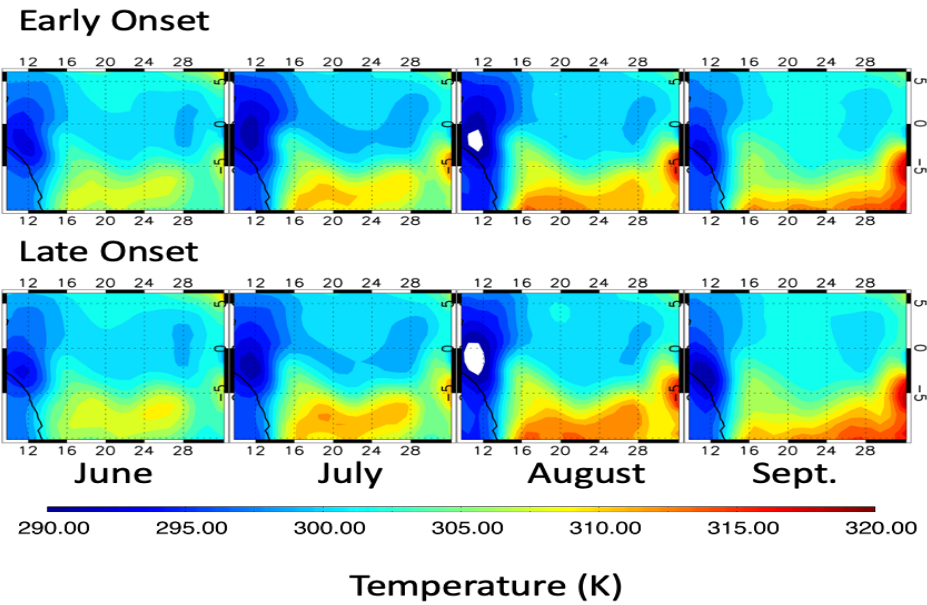

20

21 **Supplementary Figure S1.** Surface temperature (K) during early and late onset years.

22

Early onset

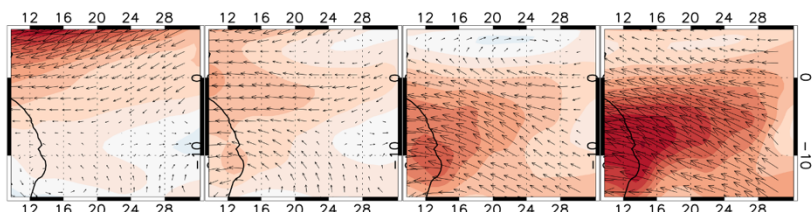

Late onset

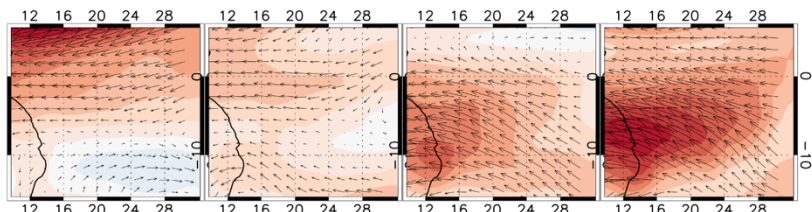

-12.50 -10.00 -7.50 -5.00 -2.50 0.00 2.50 5.00 7.50 10.00 12.50

Wind Speed [ $\text{ms}^{-1}$ ]

**Supplementary Figure S2.** Wind speed (m/s; shades) and vectors (arrows) during the early and late onset years.
